# Supplementary material for: Half-sandwich rare-earth-metal derivatives bearing pyrrolidinyl-functionalized cyclopentadienyl ligand: synthesis, characterization and catalysis in syndiospecific polymerization of styrene
Source: Royal Society of Chemistry journal article supplement (doi:10.1039/c3nj00214d), 2013-01-01
Supplement: c3nj00214d.pdf [file c3nj00214d.pdf]

## Supporting Information for

### Half-sandwich rare-earth-metal derivatives bearing pyrrolidinyl-functionalized cyclopentadienyl ligand: synthesis, characterization and catalysis in syndiospecific polymerization of styrene

Yunjie Luo,\* Shuhui Chi, and Jue Chen

*Organometallic Chemistry Laboratory, Ningbo Institute of Technology, Zhejiang*

*University, Ningbo 315100, People's Republic of China*

Corresponding author: E-mail: [lyj@nit.zju.edu.cn](mailto:lyj@nit.zju.edu.cn)

Tel: +86-574-88130085

Fax: +86-574-88130130

## Contents

**Fig. S1**  $^1\text{H}$  NMR spectrum of  $\text{C}_5\text{Me}_4\text{HSiMe}_2\text{NC}_4\text{H}_8$

**Fig. S2**  $^{13}\text{C}$  NMR spectrum of  $\text{C}_5\text{Me}_4\text{HSiMe}_2\text{NC}_4\text{H}_8$

**Fig. S3**  $^1\text{H}$  NMR spectrum of **1**

**Fig. S4**  $^{13}\text{C}$  NMR spectrum of **1**

**Fig. S5**  $^1\text{H}$  NMR spectrum of **2**

**Fig. S6**  $^{13}\text{C}$  NMR spectrum of **2**

**Fig. S7**  $^1\text{H}$  NMR spectrum of **3**

**Fig. S8**  $^{13}\text{C}$  NMR spectrum of **3**

**Fig. S9** Molecular structure of **3**

**Fig. S10**  $^1\text{H}$  NMR spectrum of **4**

**Fig. S11**  $^{13}\text{C}$  NMR spectrum of **4**

**Fig. S12**  $^1\text{H}$  NMR spectrum of **5**

**Fig. S13**  $^{13}\text{C}$  NMR spectrum of **5**

**Fig. S14**  $^1\text{H}$  NMR spectrum of **6**

**Fig. S15**  $^{13}\text{C}$  NMR spectrum of **6**

**Fig. S16** Molecular structure of **6**

**Fig. S17** GPC trace for polymer sample (Table 2, run 1)

**Fig. S18** DSC curve for polymer sample (Table 2, run 1)

**Fig. S19**  $^{13}\text{C}$  NMR for polymer sample (Table 2, run 1)

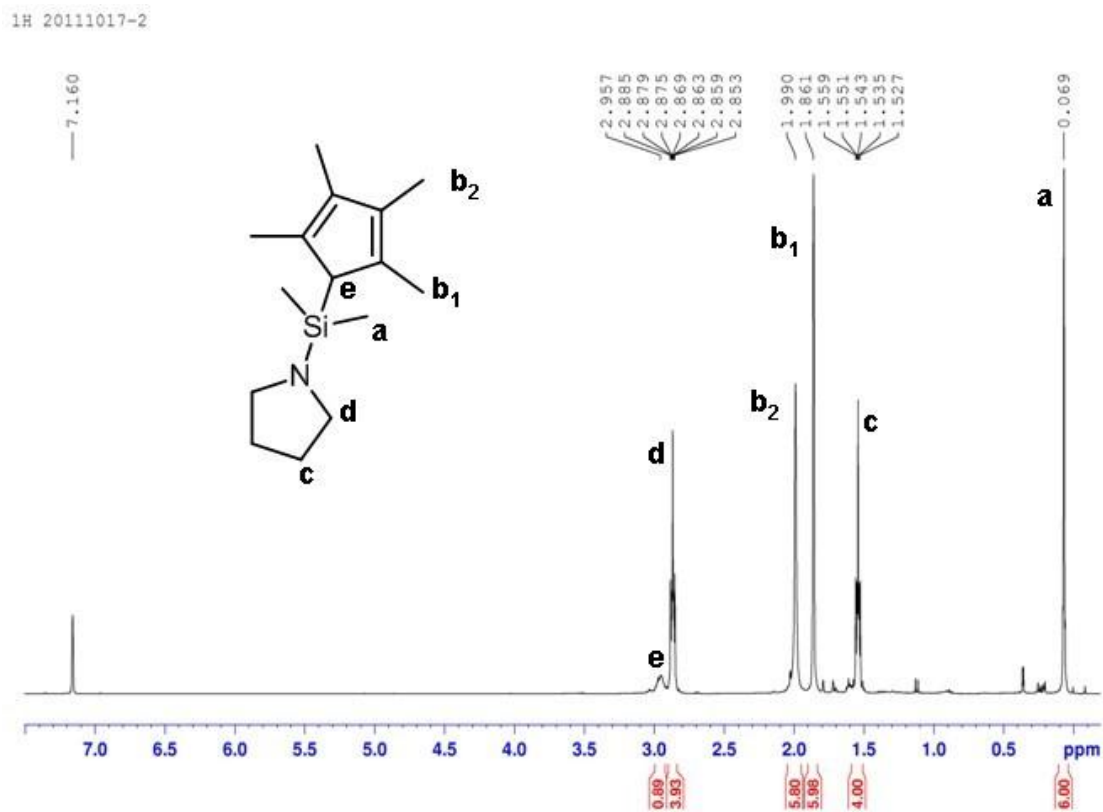

Fig. S1  $^1H$  NMR spectrum of  $C_5Me_4HSiMe_2NC_4H_8$

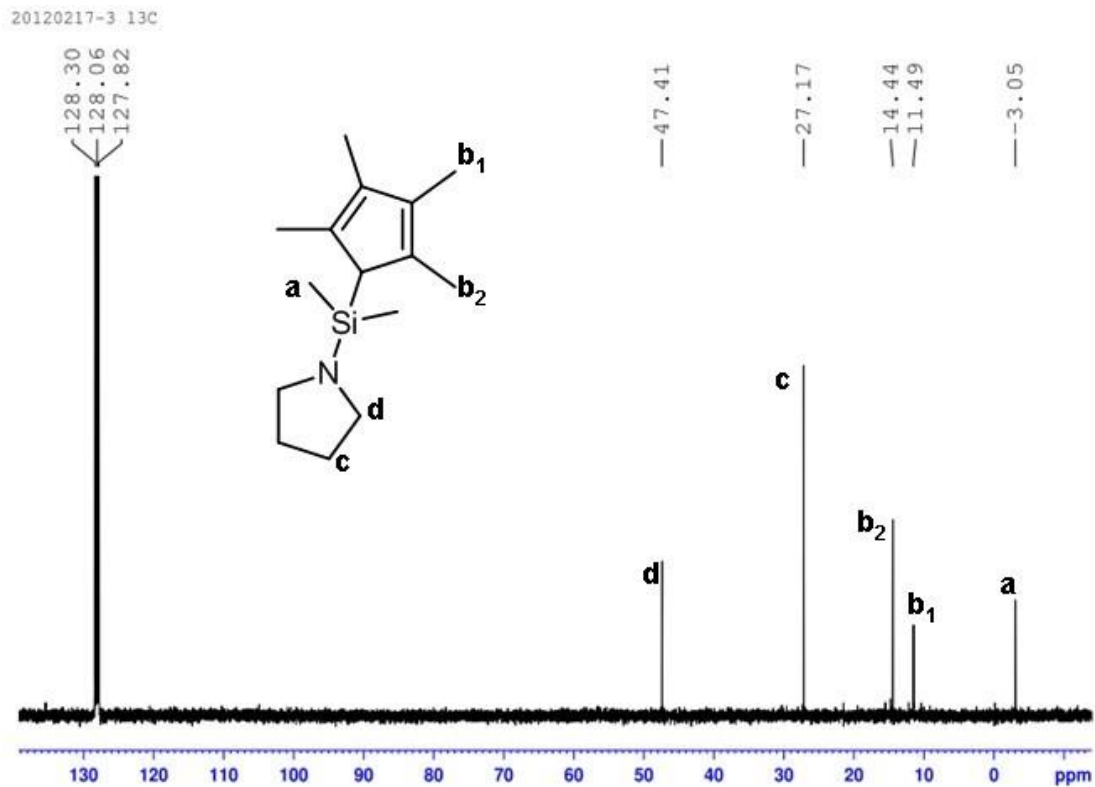

Fig. S2  $^{13}C$  NMR spectrum of  $C_5Me_4HSiMe_2NC_4H_8$

20111118-1

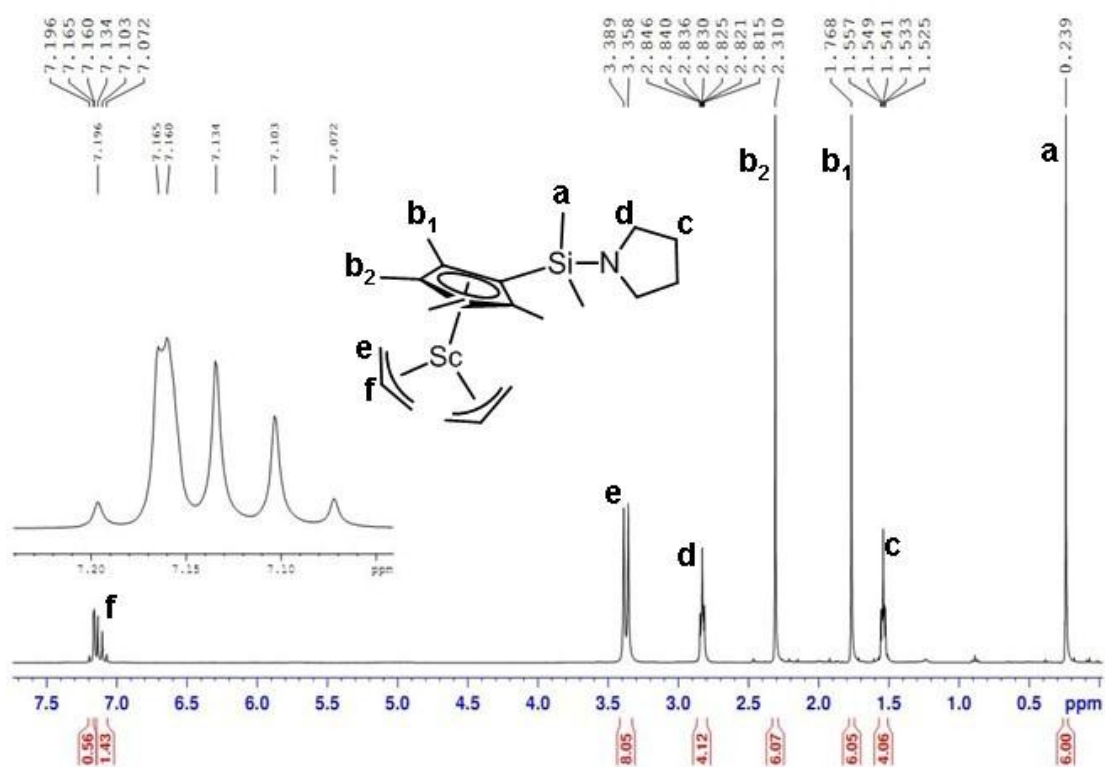

Fig. S3 <sup>1</sup>H NMR spectrum of 1

20111202C-Sc

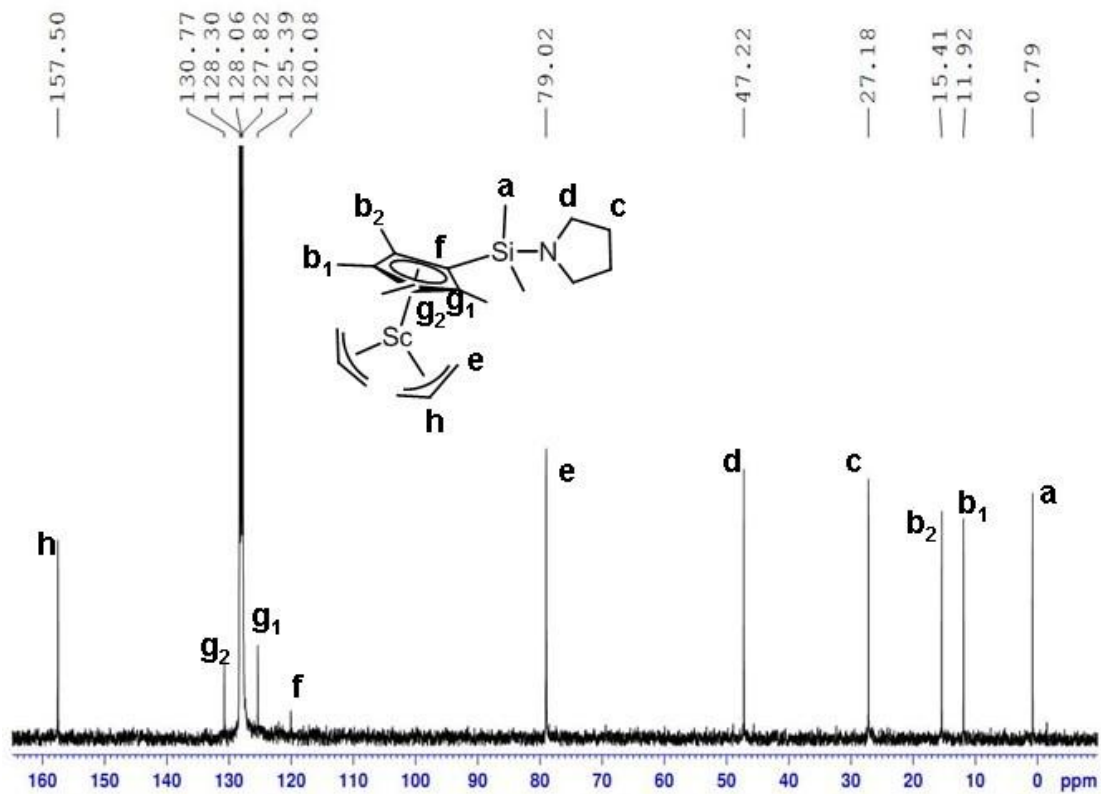

Fig. S4 <sup>13</sup>C NMR spectrum of 1

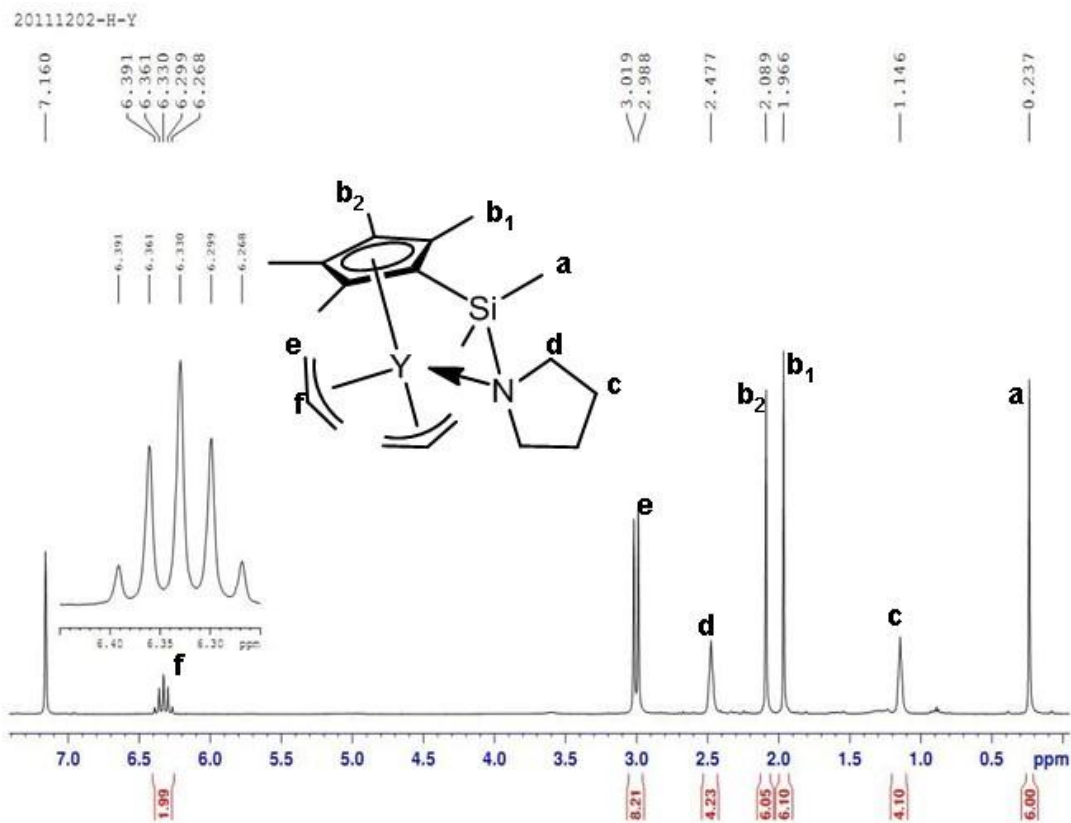

Fig. S5  $^1\text{H}$  NMR spectrum of **2**

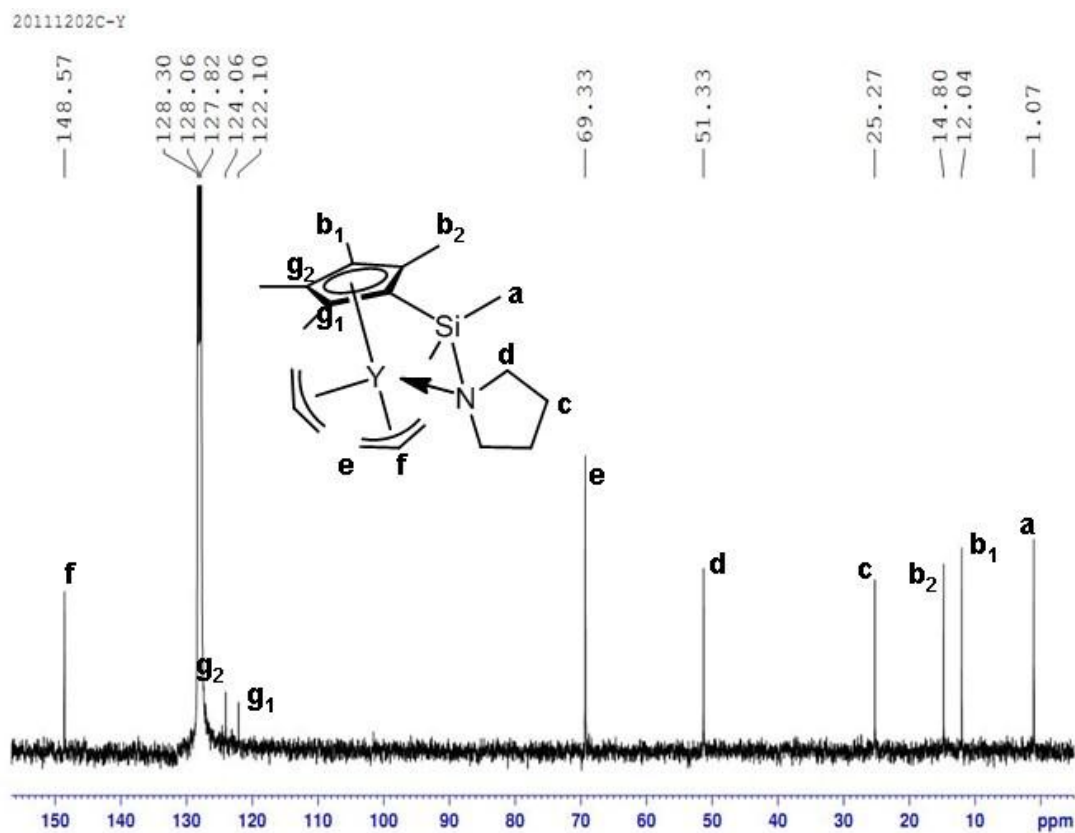

Fig. S6  $^{13}\text{C}$  NMR spectrum of **2**

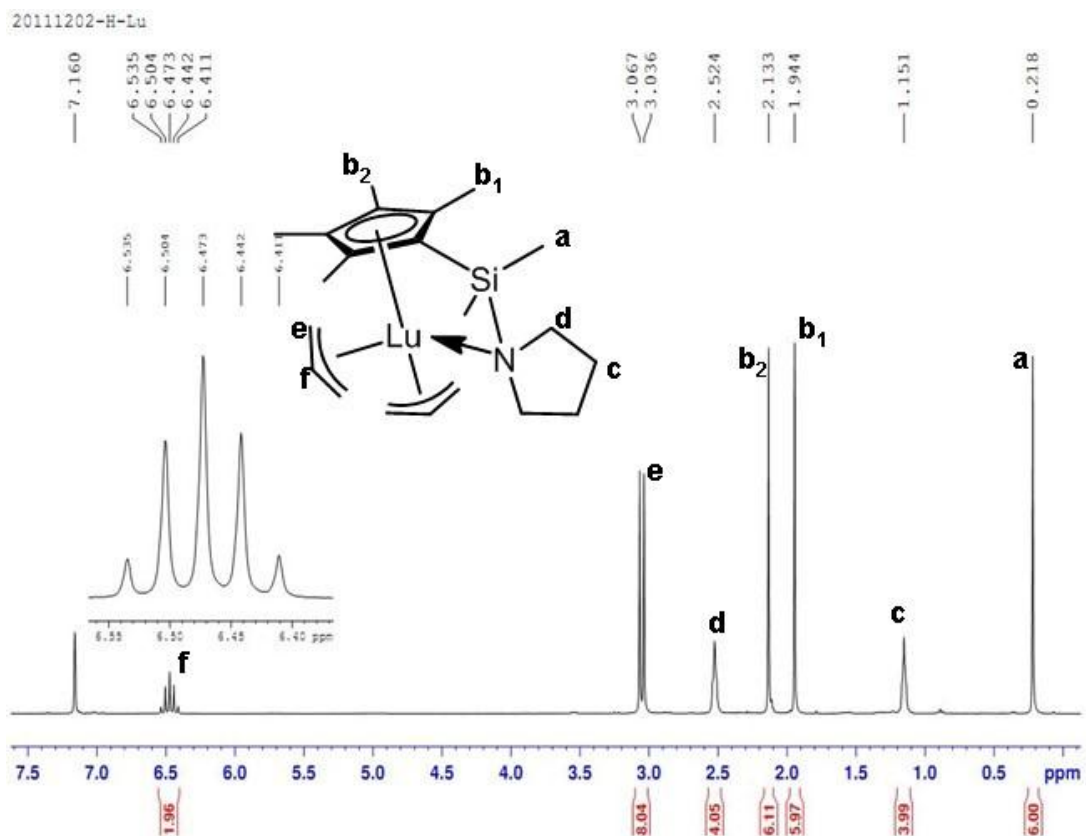

Fig. S7 <sup>1</sup>H NMR spectrum of **3**

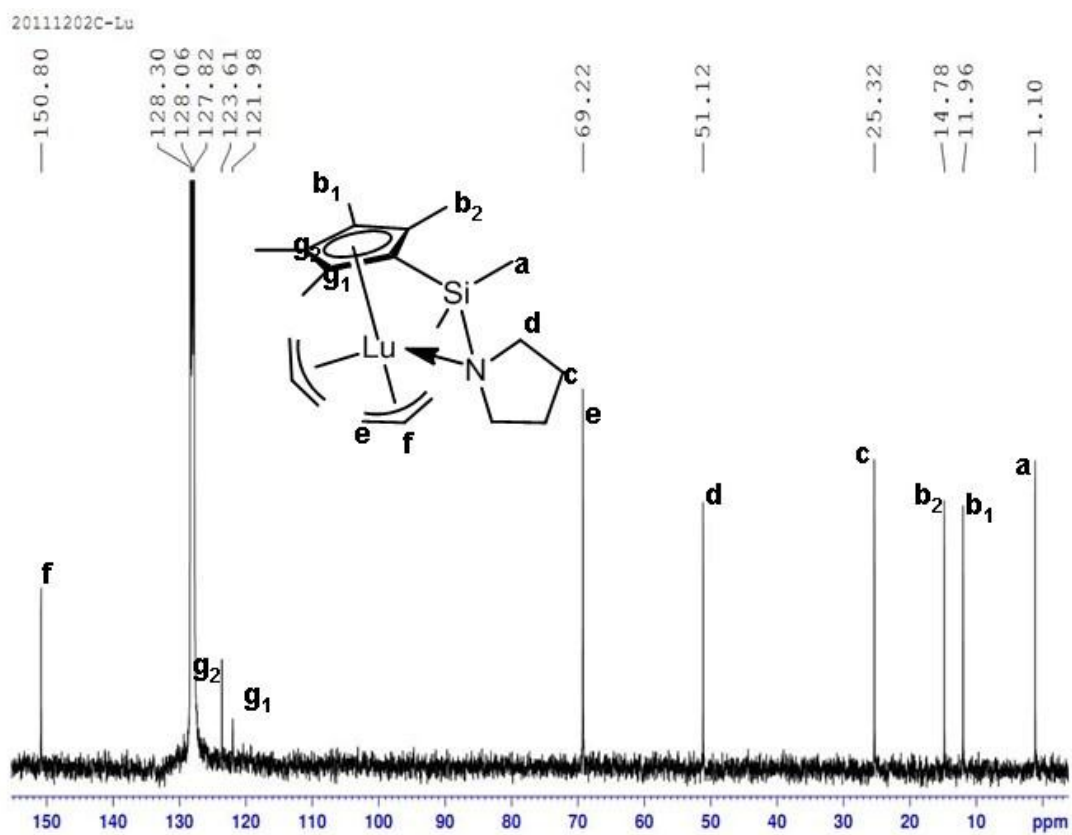

Fig. S8 <sup>13</sup>C NMR spectrum of **3**

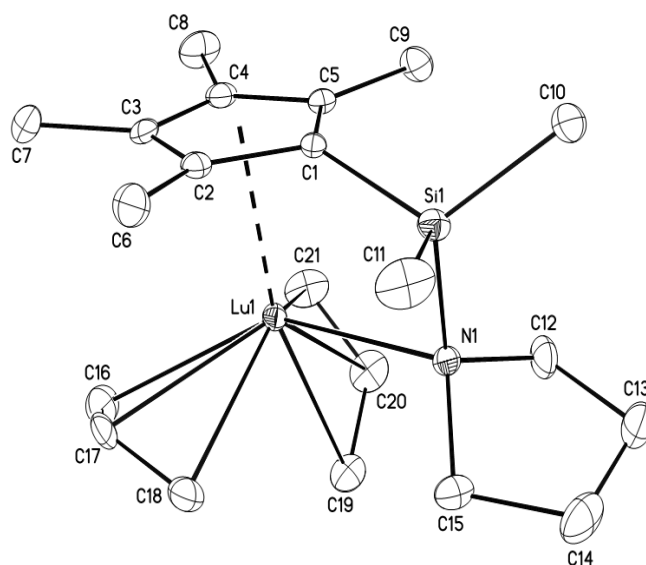

**Fig. S9.** Molecular structure of **3**. Selected bond distances (Å) and bond angles (°): Lu1-C1 = 2.523(4), Lu1-C2 = 2.637(4), Lu1-C3 = 2.728(4), Lu1-C4 = 2.647(4), Lu1-C5 = 2.528(4), Lu1-C16 = 2.596(4), Lu1-C17 = 2.564(4), Lu1-C18 = 2.539(5), Lu1-C19 = 2.633(4), Lu1-C20 = 2.592(4), Lu1-C21 = 2.506(4), Cp<sub>centroid</sub>-Lu1 = 2.320(10), C17-Lu1-C20 = 120.69(16), Cp<sub>centroid</sub>-Lu1-N1 = 95.9(3).

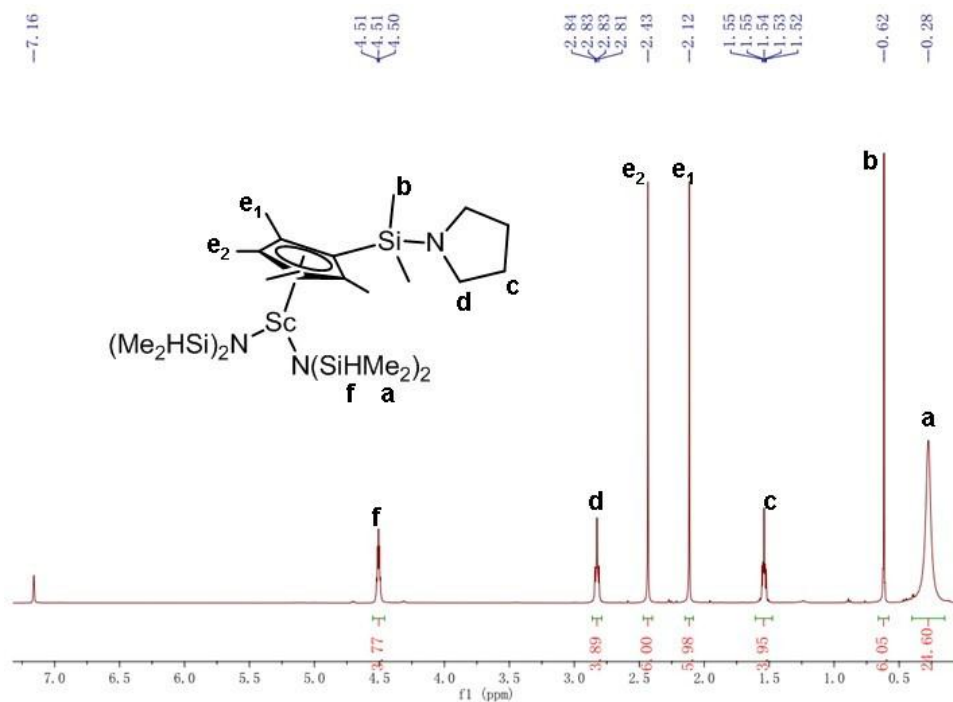

**Fig. S10** <sup>1</sup>H NMR spectrum of **4**

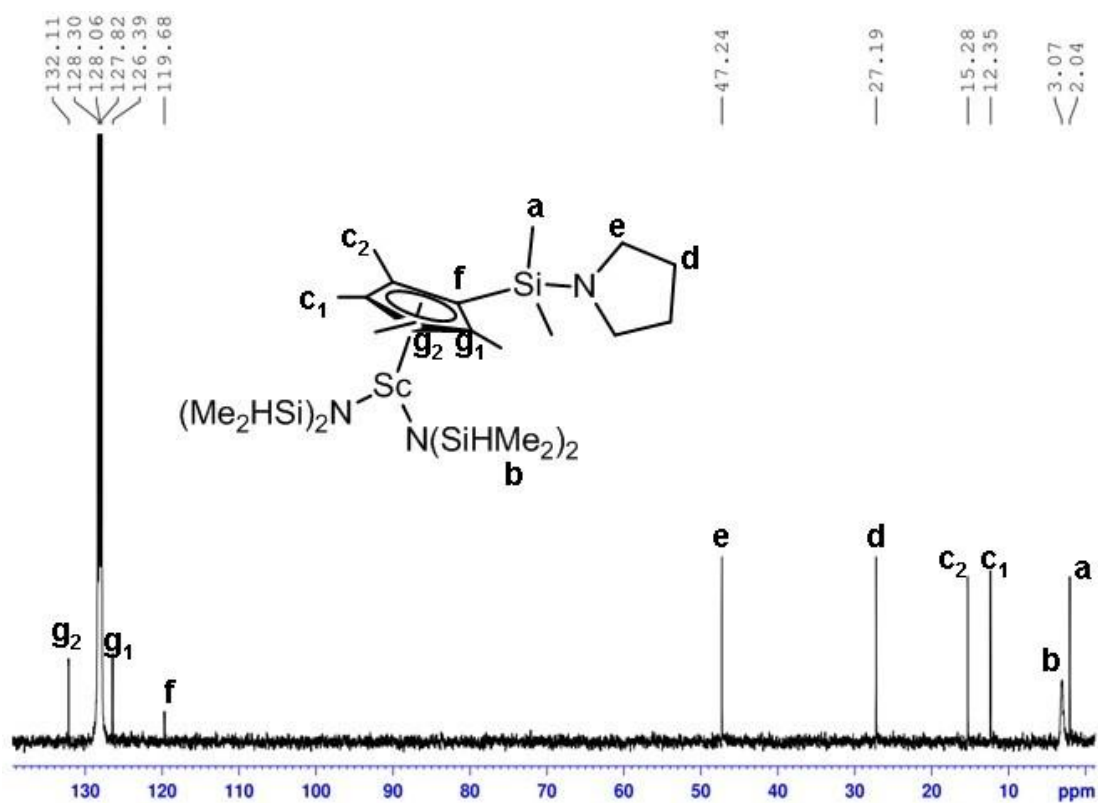

Fig. S11 <sup>13</sup>C NMR spectrum of 4

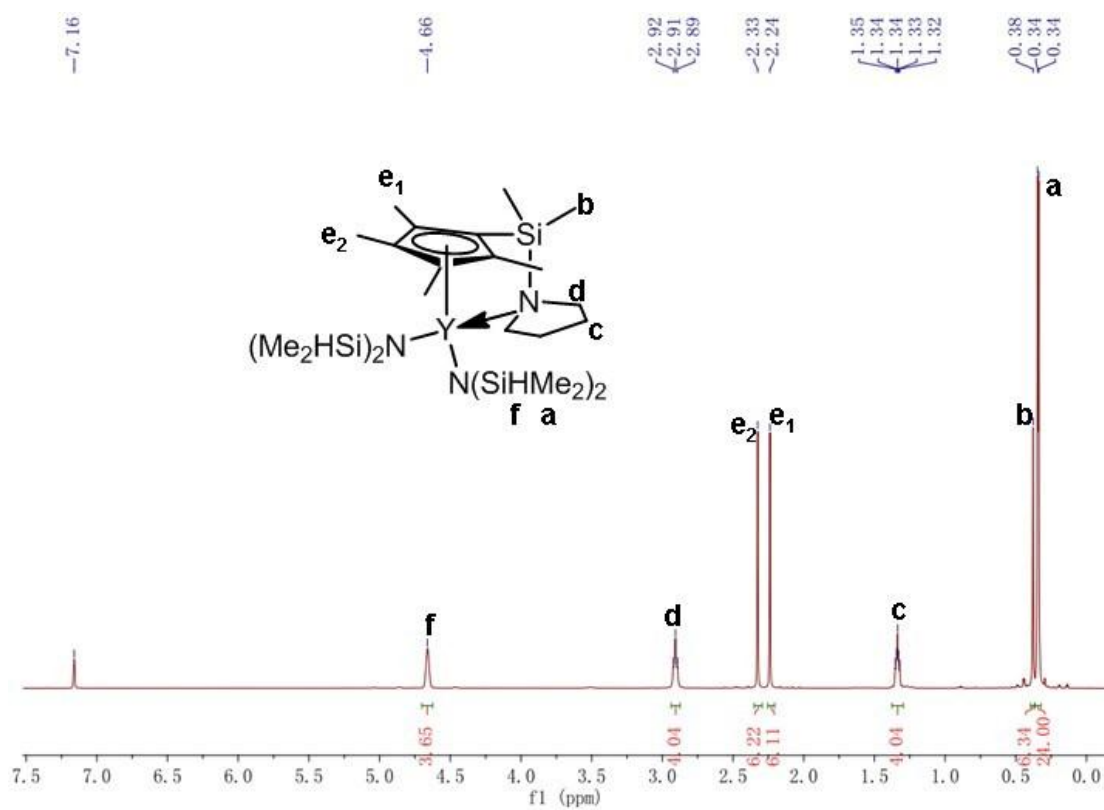

Fig. S12 <sup>1</sup>H NMR spectrum of 5



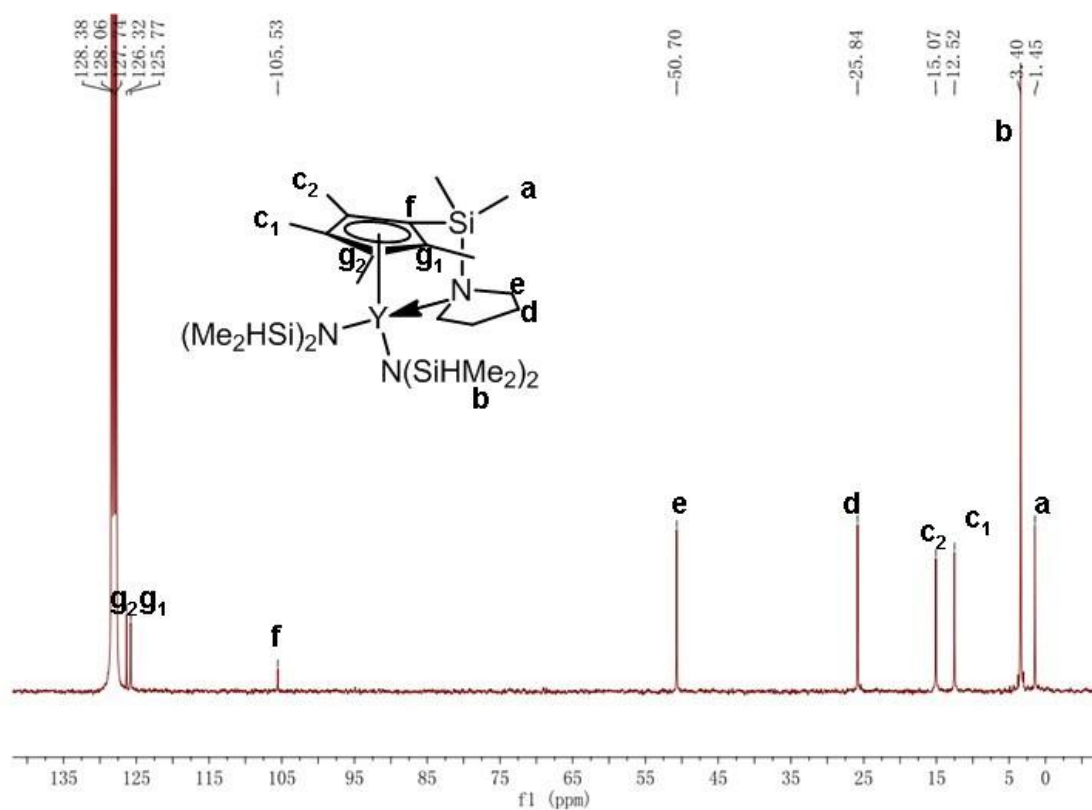

Fig. S13  $^{13}\text{C}$  NMR spectrum of **5**

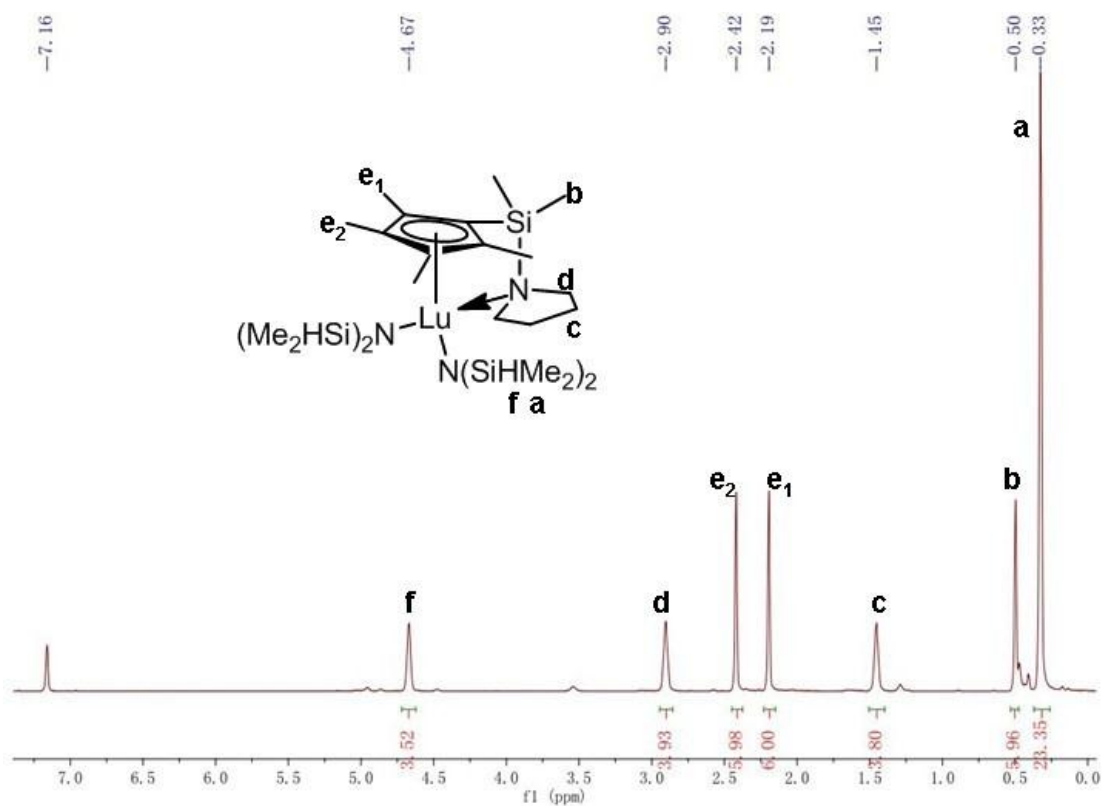

Fig. S14  $^1\text{H}$  NMR spectrum of **6**

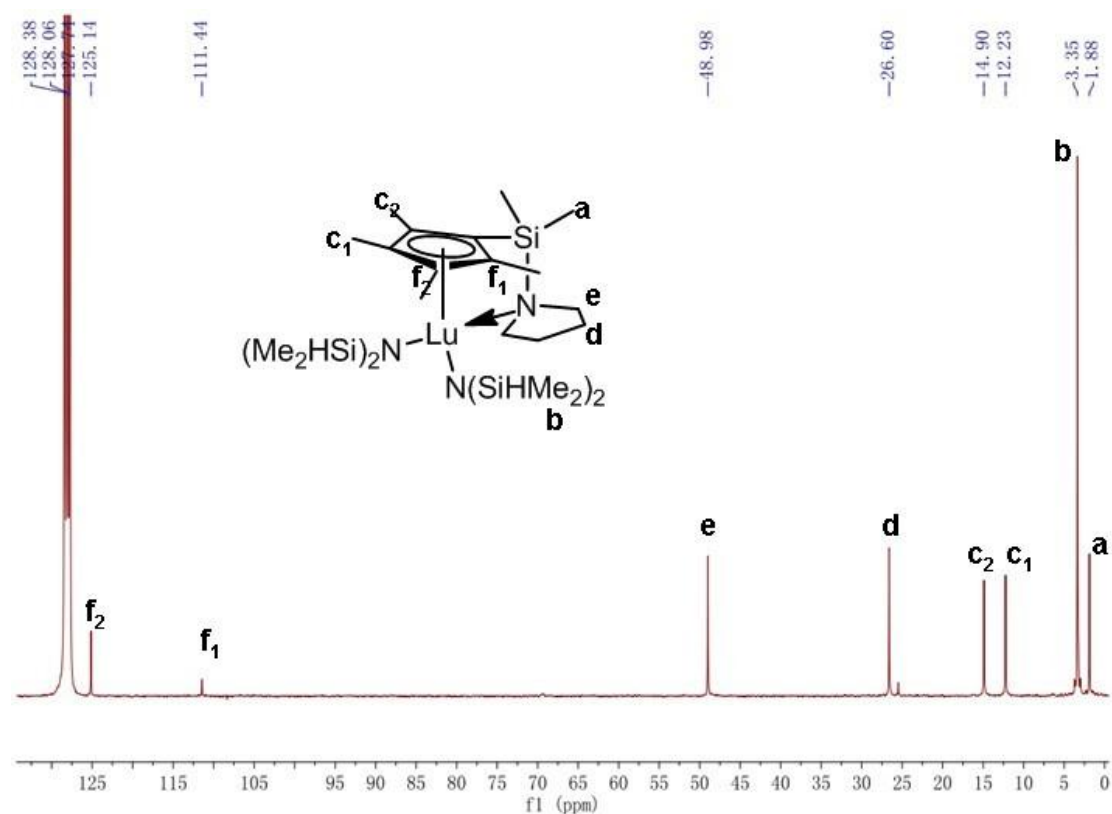

**Fig. S15**  $^{13}\text{C}$  NMR spectrum of **6**

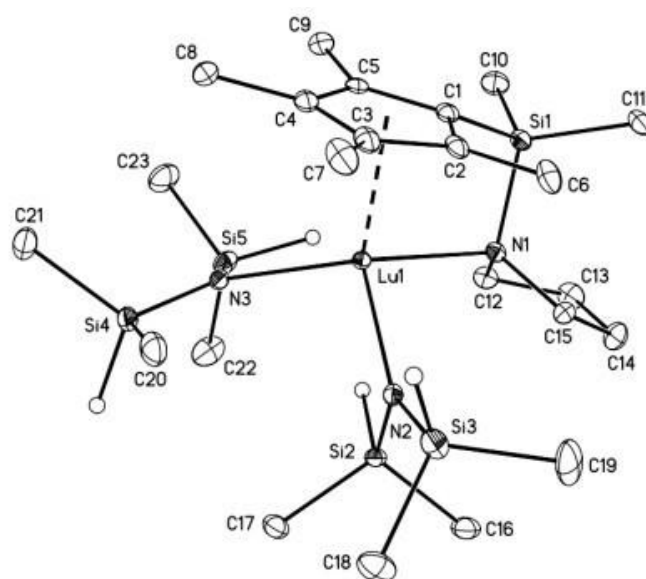

**Fig. S16.** Molecular structure of **6**. Selected bond distances ( $\text{\AA}$ ) and bond angles ( $^\circ$ ):  
Lu1-C1 = 2.550(4), Lu1-C2 = 2.612(4), Lu1-C3 = 2.708(4), Lu1-C4 = 2.707(4),  
Lu1-C5 = 2.618(4), Lu1-N2 = 2.216(3), Lu1-N3 = 2.237(3), Cp<sub>centroid</sub>-Lu1 = 2.347(9),  
N2-Lu1-N3 = 99.30(11), Cp<sub>centroid</sub>-Lu1-N1 = 94.5(3).

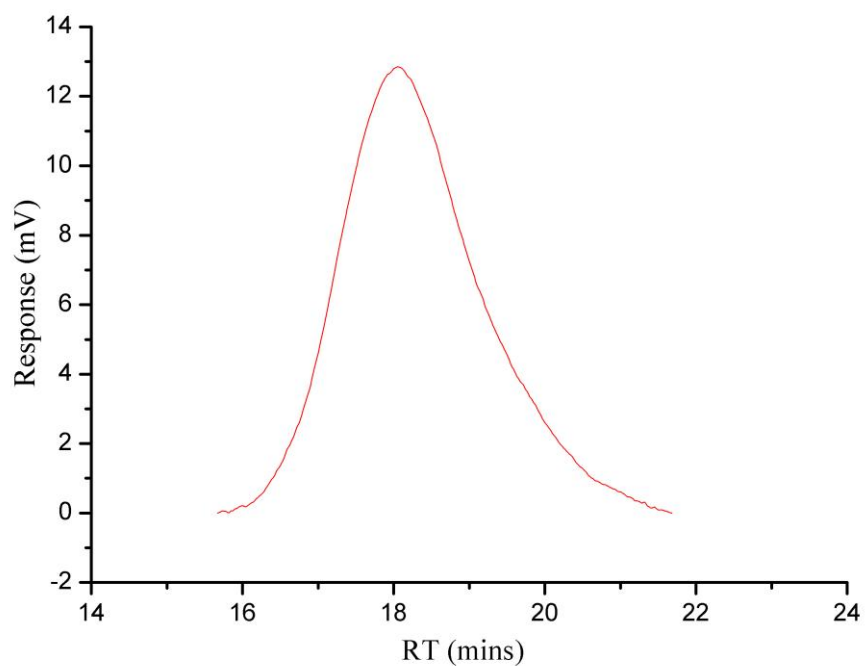

**Fig. S17** GPC trace for polymer sample (Table 2, run 1)

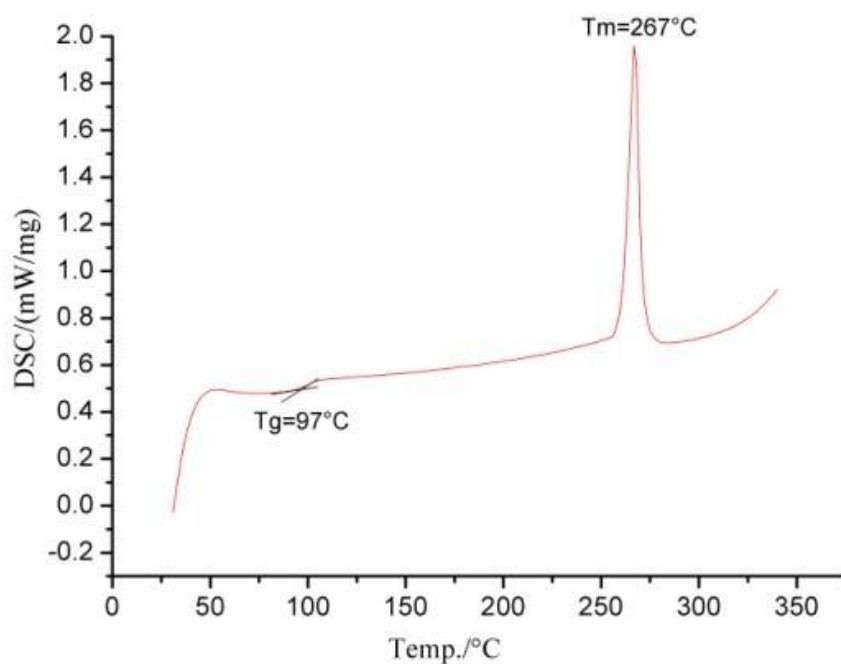

**Fig. S18** DSC curve for polymer sample (Table 2, run 1)

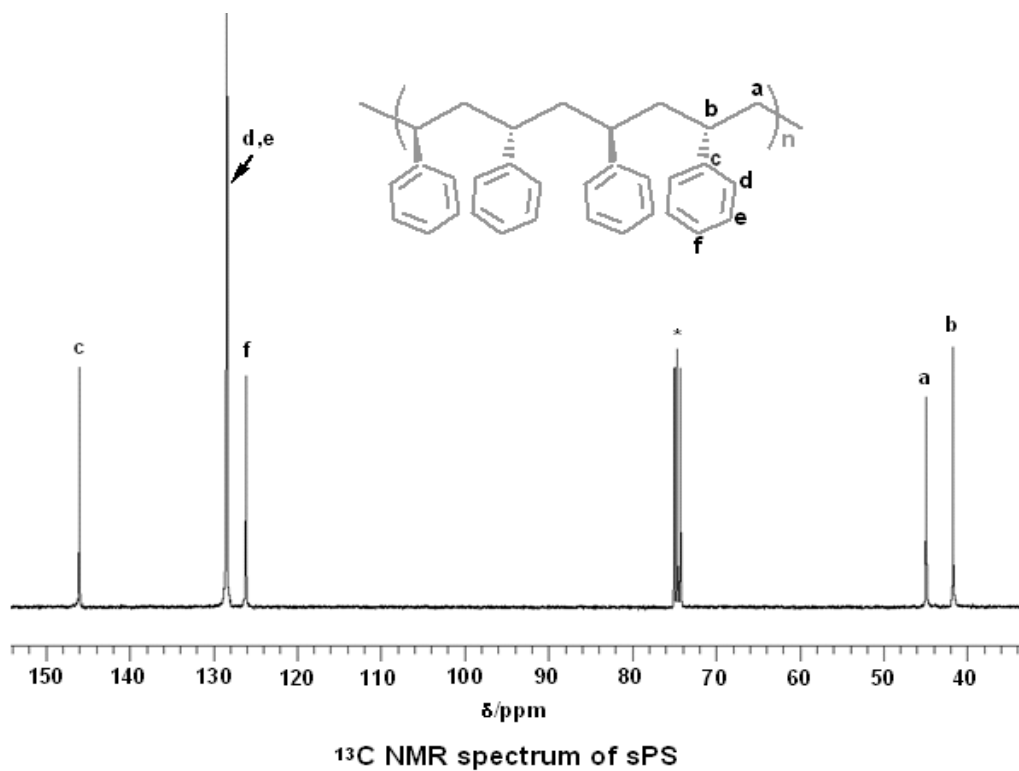

**Fig. S19**  $^{13}\text{C}$  NMR for polymer sample (Table 2, run 1)
